# Supplementary material
Source: PubMed Central journal article supplement (PMC10921920)
Supplement: NIHMS1963954-supplement-Supplement.pdf [file NIHMS1963954-supplement-Supplement.pdf]

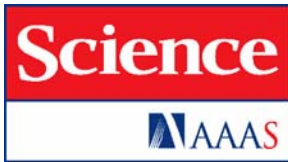

[www.sciencemag.org/cgi/content/full/334/6054/389/DC1](http://www.sciencemag.org/cgi/content/full/334/6054/389/DC1)

Supporting Online Material for

**Activity-Dependent Long-Term Depression of Electrical Synapses**

Julie S. Haas,\* Baltazar Zavala, Carole E. Landisman

\*To whom correspondence should be addressed. E-mail: [julie.haas@gmail.com](mailto:julie.haas@gmail.com) (J.S.H.);  
[carole.landisman@hms.harvard.edu](mailto:carole.landisman@hms.harvard.edu) (C.E.L.)

Published 21 October 2011, *Science* **334**, 389 (2010)  
DOI: 10.1126/science.1207502

**This PDF file includes:**

Materials and Methods

Figs. S1 and S2

## Methods

**Slice preparation, recording, and drugs:** Thalamocortical slices 400  $\mu\text{m}$  thick were obtained from Sprague-Dawley rats aged P12 - P14. Slices were cut and incubated in sucrose solution (in mM: 72 Sucrose, 83 NaCl, 2.5 KCl, 1  $\text{NaPO}_4$ , 3.3  $\text{MgSO}_4$ , 26.2  $\text{NaHCO}_3$ , 22 Dextrose, 0.5  $\text{CaCl}_2$ , saturated with 95%  $\text{O}_2$ /5%  $\text{CO}_2$ ). Slices were incubated at 33  $^\circ\text{C}$  for 20 min and returned to room temperature thereafter. The bath solution for recording contained (in mM): 126 NaCl, 3 KCl, 1.25  $\text{NaH}_2\text{PO}_4$ , 2  $\text{MgSO}_4$ , 26  $\text{NaHCO}_3$ , 10 dextrose and 2  $\text{CaCl}_2$ , saturated with 95%  $\text{O}_2$ /5%  $\text{CO}_2$ . The submersion recording chamber was held at 32 - 33  $^\circ\text{C}$  (TC-324B, Warner). Micropipettes were filled with (in mM): 135 K-gluconate, 2 KCl, 4 NaCl, 10 HEPES, 0.2 EGTA, 4 ATP-Mg, 0.3 GTP-Tris, and 10 phosphocreatine-Tris (pH 7.25 with 1 M CsOH or 1M KOH; 295 mOsm). The approximate bath flow rate was 2 ml/min. Voltages are reported as corrected for the liquid junction potential. When noted, the bath also included 1  $\mu\text{M}$  TTX to block voltage-gated sodium channels.

**Dye preparation.** Dye was prepared fresh daily, starting with a 50  $\mu\text{g}$  aliquot of Oregon Green 488 BAPTA-1 AM; 5  $\mu\text{L}$  of 20% pluronic F-127 in DMSO was added to the dye vial, and vortexed for 5 min. Next 44  $\mu\text{L}$  of ACSF was added and vortexed again for 5 min. The solution was sonicated in an ice-water slurry for 30 min, then filtered with a centrifuge at 10 kRPM for 1 min.

**Slice bulk-loading.** ~20  $\mu\text{L}$  of dye solution was loaded into the tip of a glass recording electrode. The electrode tip was broken against the bottom of the recording chamber, then moved to the area of interest, and inserted into the slice at a depth of 50-100  $\mu\text{m}$ . Positive pressure was applied to the electrode with a Hamilton micro-syringe and left in place for 3 min.

**Imaging.** An X-Cite series 120 mercury lamp was manually shuttered for light exposures lasting several hundred ms; images and whole-cell data were collected before and during electrical stimulation of recorded cell(s). The filter set was 470 nm excitation, 525 nm emission with a 495 nm beam splitter in a Zeiss AxioSkop 2 FS Plus. Images were collected with AxioVision software driving an AxioCam MR3 for a 13-ms exposure into a 1388x1040 pixel image with 8-bit grey-level resolution. To raise the excitability of imaged neurons, the external ACSF was modified to contain 0.75 mM  $\text{CaCl}_2$  and 7 mM KCl.

**Numerical Analyses:** The coupling coefficient is the attenuation of signal transfer between one cell and its electrically coupled neighbor, measured as a ratio of the postsynaptic voltage transmitted via the gap junction divided by the presynaptic voltage response.

To measure **cc**, we injected 100 – 200 pA hyperpolarizing current steps, each lasting 600 ms (1-sec ISI), and measured the steady-state voltage responses of the injected cell and its electrically coupled neighbor. The coupling coefficient **cc**<sub>12</sub> =  $\Delta V_{\text{cell } 2} / \Delta V_{\text{cell } 1}$ , where  $\Delta V_{\text{cell } 1}$  is the change in membrane voltage in the injected cell and  $\Delta V_{\text{cell } 2}$  is the change in membrane voltage in the coupled cell. Reported data of **cc** represent the average of 10 - 20 measurements.

Gap junctional conductance **G<sub>c</sub>** was calculated by first calculating transfer resistance based on current injection into cell 2:  $R_{21} = \Delta V_{\text{cell } 1} / I_{\text{inj, cell } 2}$ , and similarly,  $R_{12}$  from current injection into cell 1. With  $R_{\text{in},1}$  representing the input resistance of cell 1, the resistance of the electrical synapse is taken as from Bennet (NY Academy of Sciences, 1966):

$$R_c = \frac{R_{\text{in},1} R_{\text{in},2} - R_{12}^2}{R_{12}}$$

Then **G<sub>12</sub>** =  $1/R_c$  when measured with current injection into cell 1, and **G<sub>21</sub>** was measured by injection into cell 2. For  $R_{12} \ll R_{\text{in},1}$  and  $R_{\text{in},2}$ , it is easily shown that the ratio **G<sub>12</sub>/G<sub>21</sub>**  $\approx R_{12}/R_{21}$  and is independent of input resistance.

Unless otherwise indicated, values in the text are mean  $\pm$  SEM and significance was assessed by 2-tailed student's t-test, paired when appropriate (Fig. 4) and unpaired when direct within-pair comparisons could not be made (Fig. 2, 3). For all experiments, data were discarded from analysis for pairs in which  $R_{\text{in}}$  for either cell deviated by more than 20% from its baseline value, and for pairs in which the CV of the baseline values of **cc** exceeded 0.1. Reported average changes in **cc** and **G<sub>c</sub>** are the average of the changes over all pairs comparing the entire pre- to the entire post-activity period; the plotted data **cc** and **G<sub>c</sub>** were binned for each time point.

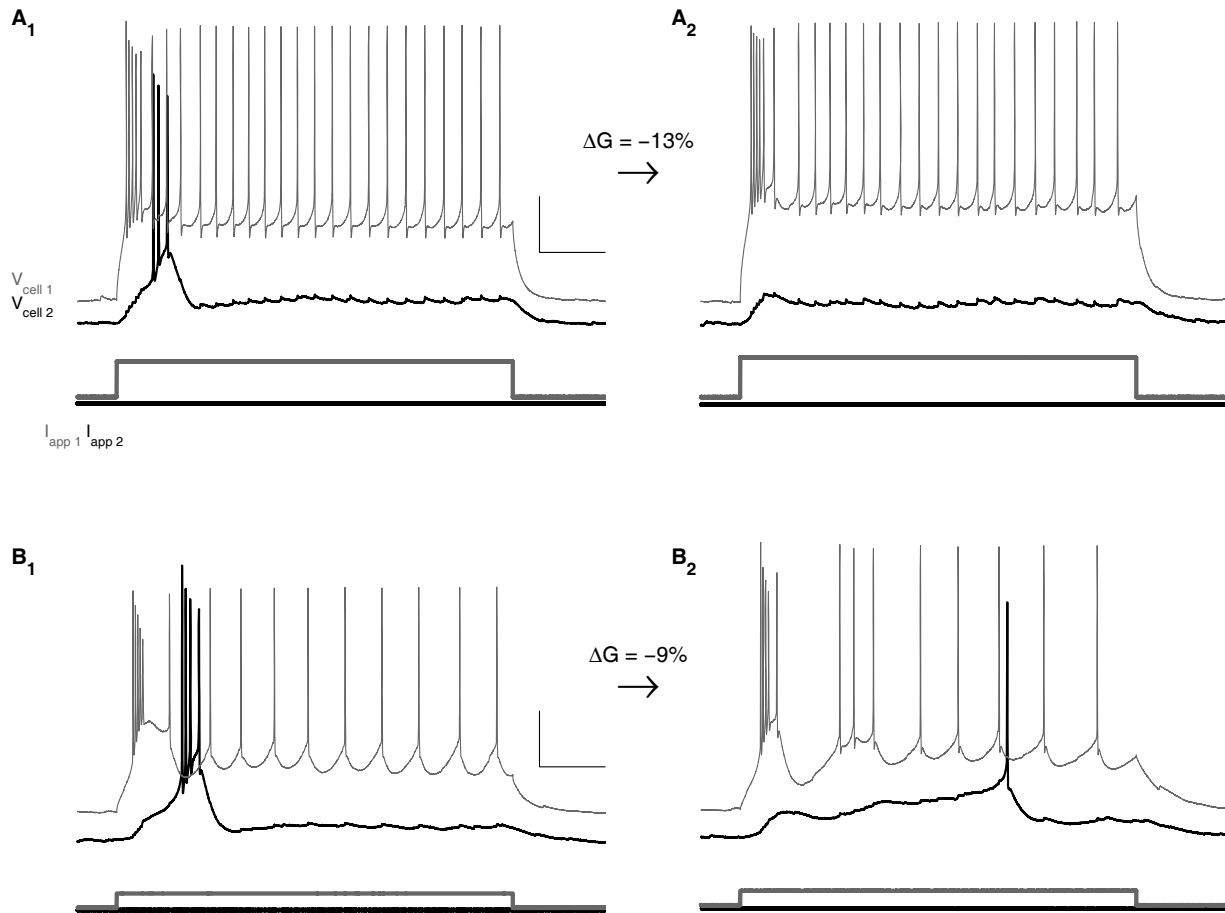

**Supplementary Fig. 1.** Gap junction-related activity before and after LTD. A<sub>1</sub>). For one pair of neurons ( $cc_{12} = 0.2$ ,  $G_{12} = 2.2$  nS), spikes driven by current injection into cell 1 (gray traces;  $V_{\text{cell } 1}$ ,  $I_{\text{app } 1}$ ) initially elicited a burst in cell 2 (black traces). Scale bar 20 mV, 100 ms, 400 pA. A<sub>2</sub>) After paired bursting resulting in LTD ( $\Delta G_{12} = -13\%$ ;  $\Delta cc_{12} = -11\%$ ), the same stimulus and resulting spike train in cell 1 failed to elicit a burst in cell 2. B<sub>1</sub>), B<sub>2</sub>): Same paradigm as in (A) for a pair with initial  $cc_{12} = 0.18$  and  $G_{12} = 1.3$  nS,  $\Delta G_{12} = -9\%$ ;  $\Delta cc_{12} = -8\%$ . Scale bar 20 mV, 100 ms, 400 pA.

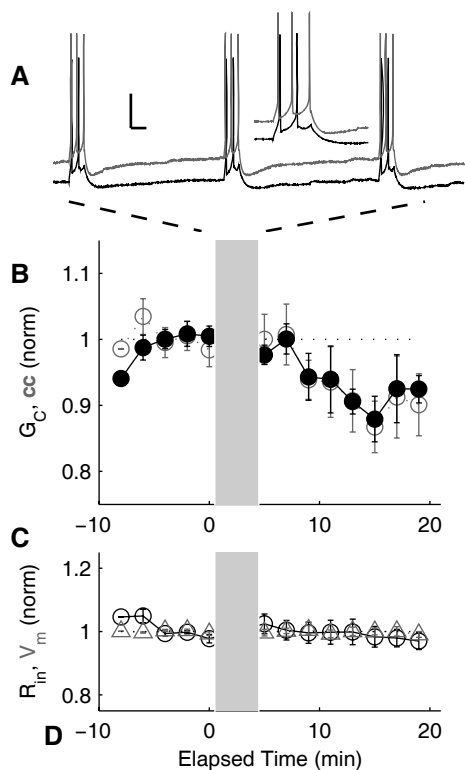

**Supplemental Fig. 2.** Paired sodium spikes without low-threshold calcium spikes. A) Coupled cells were driven with 50-ms current pulses from elevated rest voltages just below spike threshold ( $\sim V_m = -40$  mV, set with steady current injection) to drive fast spikes without eliciting the low-threshold calcium spikes that underlie bursts. Pairings were repeated at 2 Hz for 5 min. Scale bar 20 mV, 50 ms. Inset, close-up of paired spiking. B) Paired fast spiking without bursting induced a delayed, smaller magnitude of LTD (mean  $\Delta G_c = -7.2 \pm 2.0\%$ ,  $p = 0.03$ ; mean  $\Delta cc = -7.0 \pm 2.8\%$   $n = 8$  pairs). C) Normalized input resistance ( $R_{in}$ ) and resting membrane potential ( $V_m$ ) for the cells shown in B.

For regular bursts (Fig. 2), each low-threshold calcium spike contained  $2.9 \pm 0.3$  sodium spikes per burst, separated by  $11.2 \pm 0.1$  ms (89.3 Hz). For sodium spikes stimulated without activating the low-threshold calcium spikes (above), stimuli yielded  $2.9 \pm 0.02$  spikes per 50-ms stimulus but were separated on average by  $22.2 \pm 0.9$  ms (45.0 Hz).
